# Supplementary material
Source: PubMed Central journal article supplement (PMC5628128)
Supplement: NIHMS888853-supplement-1.pdf [file NIHMS888853-supplement-1.pdf]

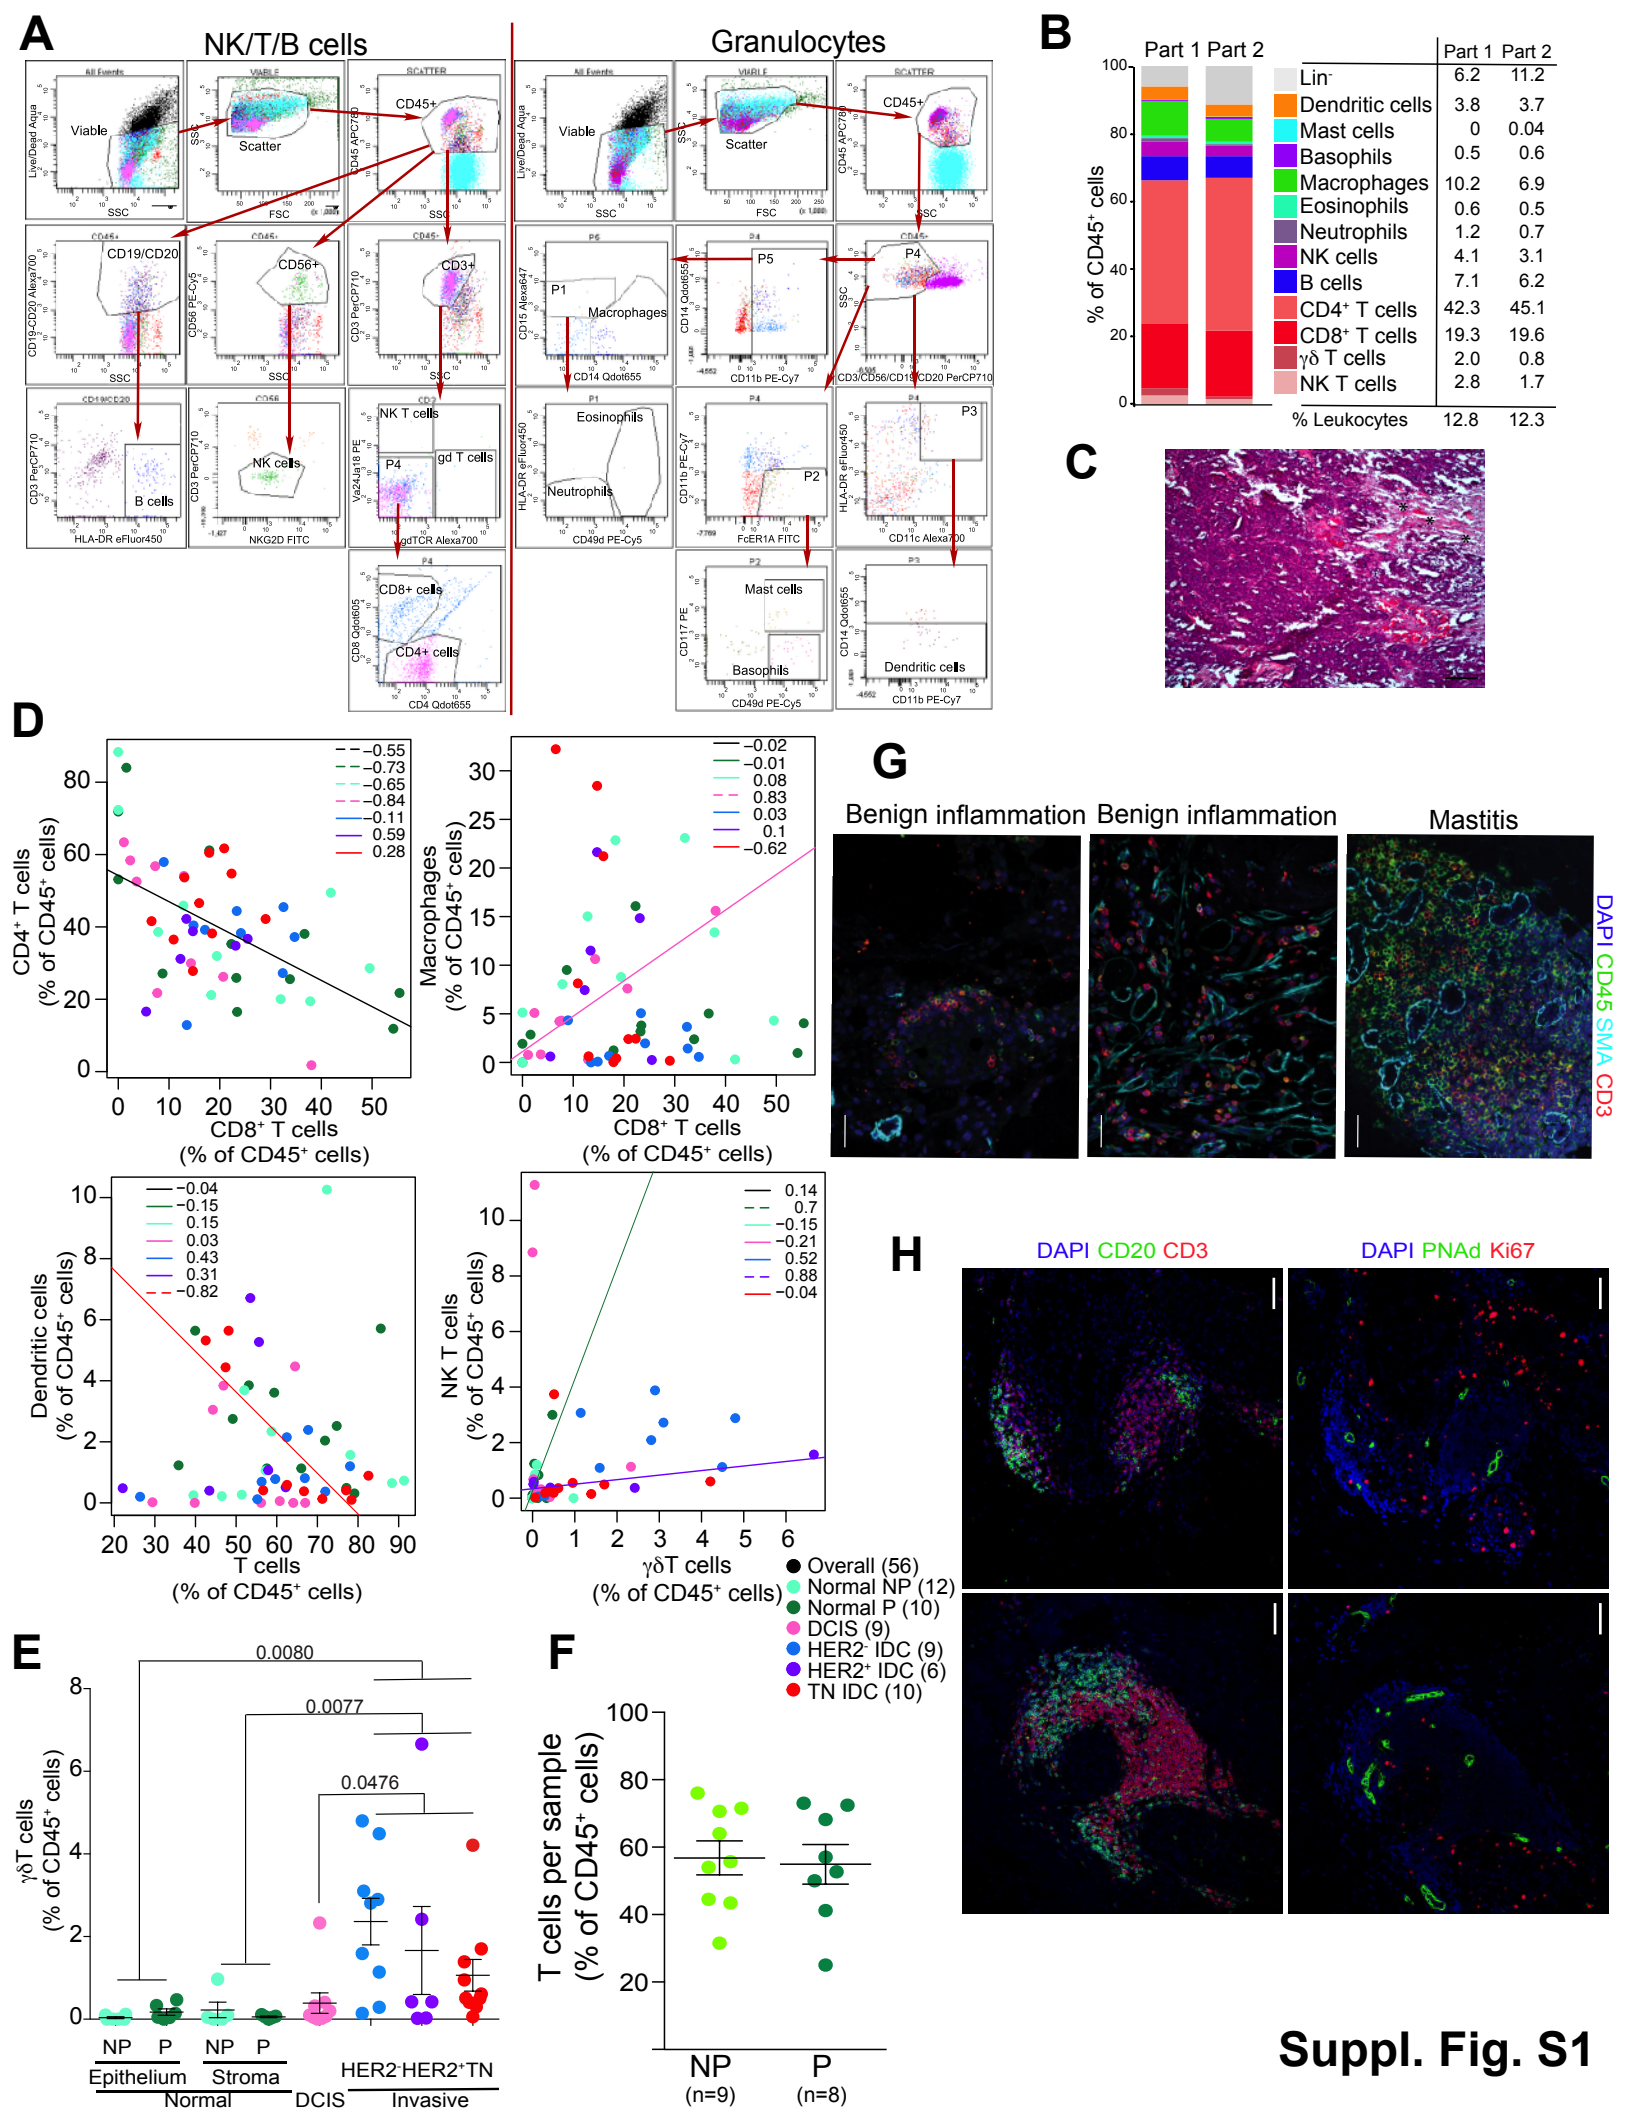

**Supplementary Figure S1.** Leukocyte frequencies in breast tissues. **A**, Gating strategy for the identification of lymphocyte (left) and myeloid-lineage (right) populations. Arrows indicate directionality of subgates. Identified populations are marked in bold. **Supplementary Table S8** lists all antibodies used for FACS. **B**, Summary of polychromatic FACS analyses of leukocyte populations in two independent parts of the same tumor sample. Leukocyte abundance is shown as percentage of total viable cells, whereas the relative fractions of specific cell populations are shown as a percent of total CD45<sup>+</sup> cells. **C**, Hematoxylin-eosin staining of the tumor sample analyzed in panel B. Scale bar 100 μm. Stars mark leukocytes. **D**, Correlation plots to depict associations between the frequencies of CD8<sup>+</sup> T cells and CD4<sup>+</sup> T cells, T cells and dendritic cells, CD8<sup>+</sup> T cells and macrophages, and γδ T cells and NK T cells. Combined epithelium and stroma data are shown in light and dark green for nulliparous (Normal NP) and parous (Normal P) samples, respectively. All other colors reflect tissue types as indicated. Correlation coefficients, *r*, are shown for each individual group as well as for the combined data (overall). Trend lines are indicated only for significant (<0.05) correlations, are corresponding *r* are marked with a dotted line, *n* – number of samples in group. **E**, Relative fraction of γδT cells quantified based on FACS. Results are shown as percent of total CD45<sup>+</sup> cells. **F**, Frequency of CD3<sup>+</sup> T cells in normal breast tissue samples quantified based on immunofluorescence images. Results are shown as percent of total CD45<sup>+</sup> cells. NP- nulliparous and P - parous, respectively. **G**, Immunofluorescence analysis of CD3<sup>+</sup> T cells in mastitis and benign inflammation samples. **H**, Examples of potential tertiary lymphoid structures in DCIS. Scale bar, 150 μm.

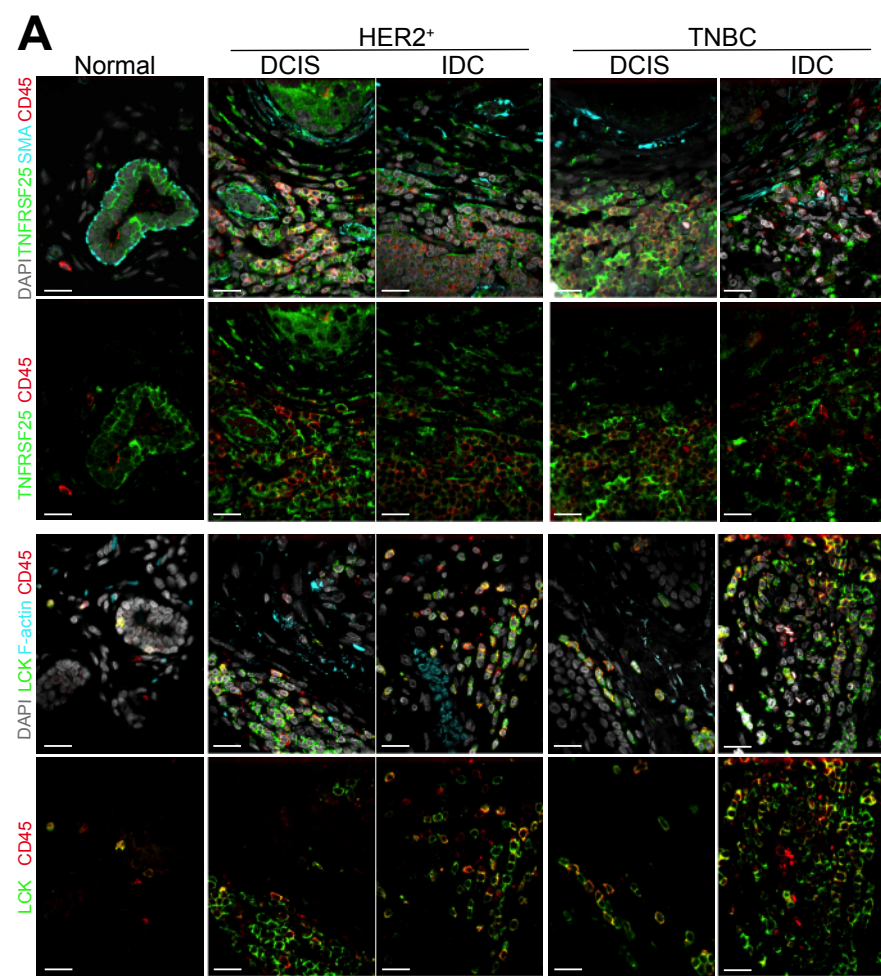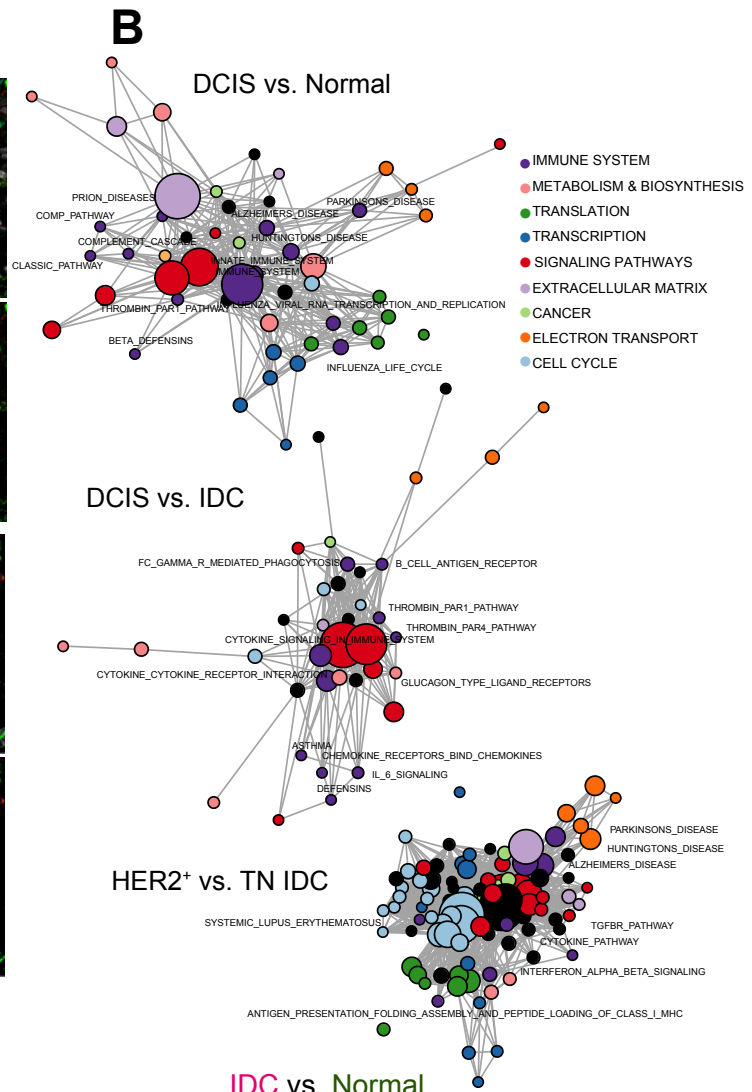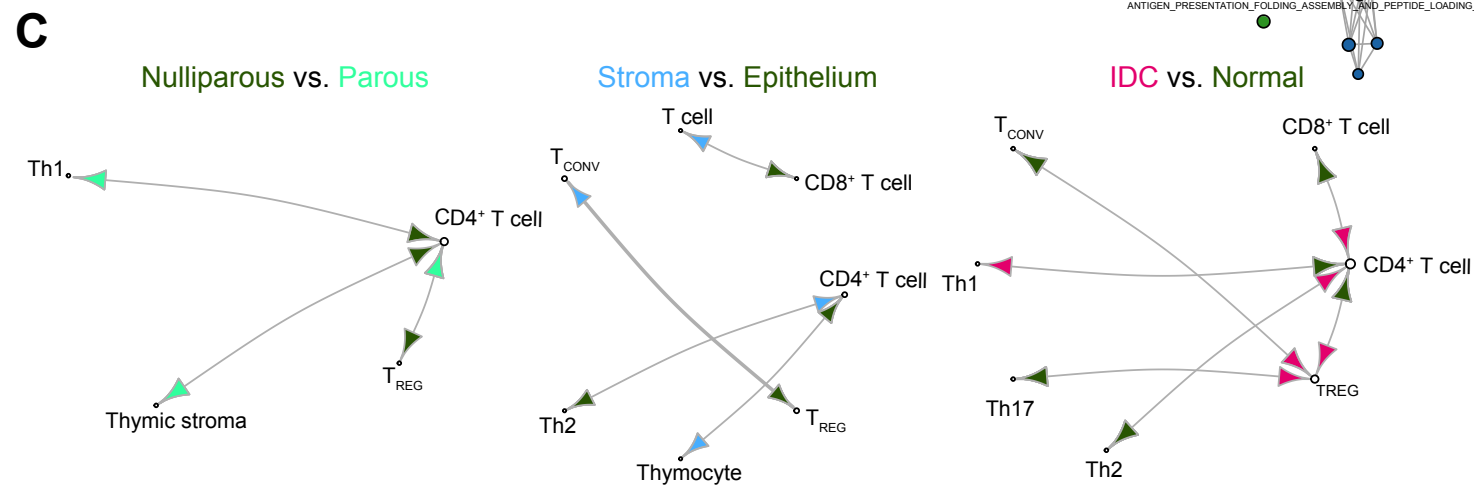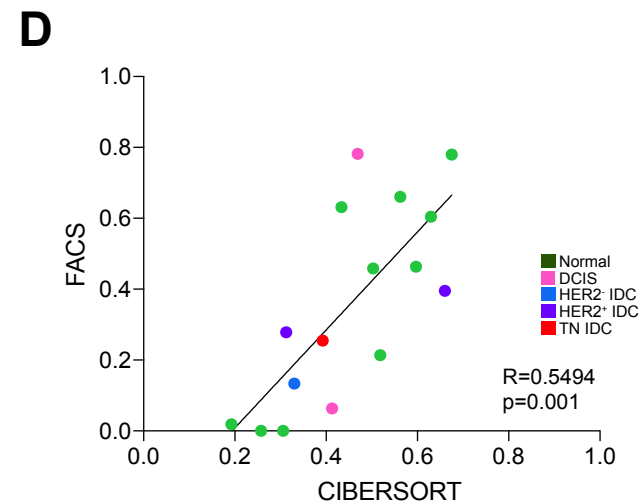

**Supplementary Figure S2.** Genes expressed in T cells. **A**, Immunofluorescence analysis of LCK and TNFRSF25 expression. Scale bar 50  $\mu\text{m}$ . **B**, Network of significantly enriched canonical gene sets in the indicated comparisons. Node size is reflective of the number of genes in the set. **C**, Network diagrams of enriched cell type-specific gene sets from using ImmuneSigDB. **D**, Plot depicting correlation between frequency of CD8<sup>+</sup> T cells assessed by FACS or CIBERSORT analysis of CD3<sup>+</sup> T cell RNA-seq data.

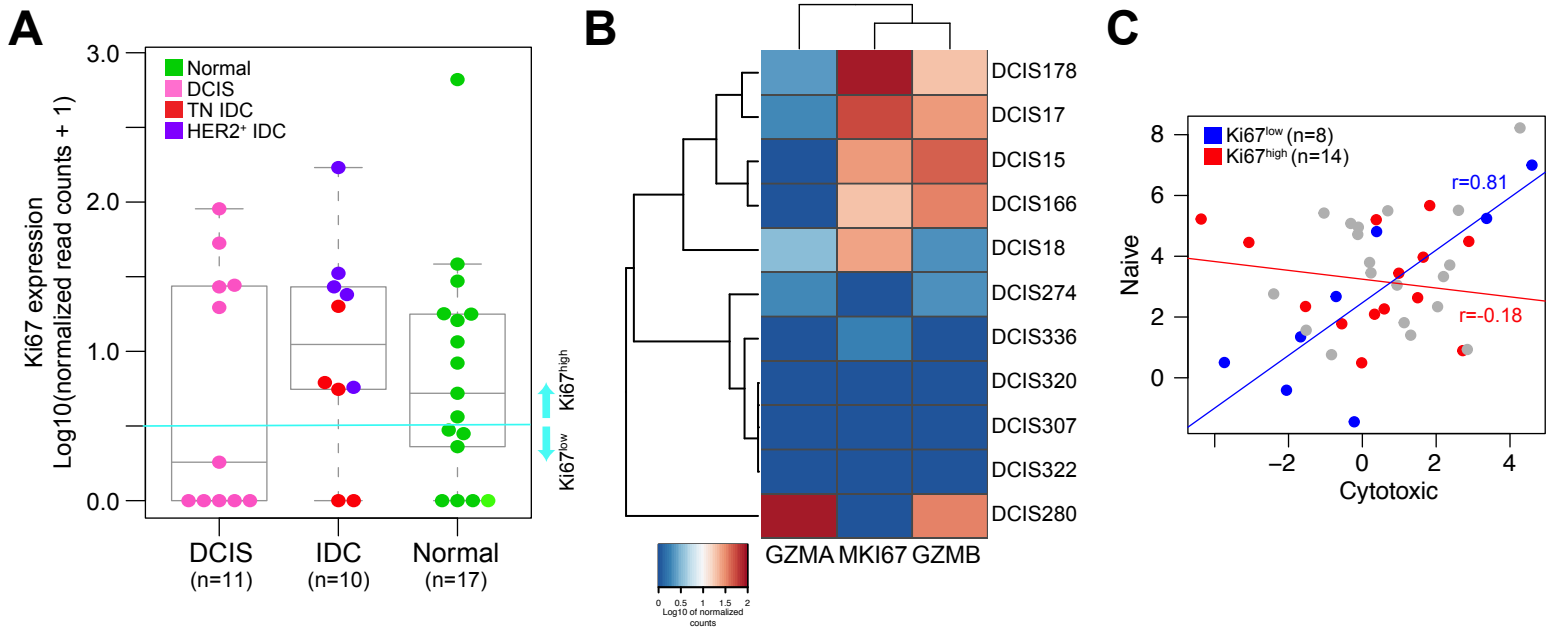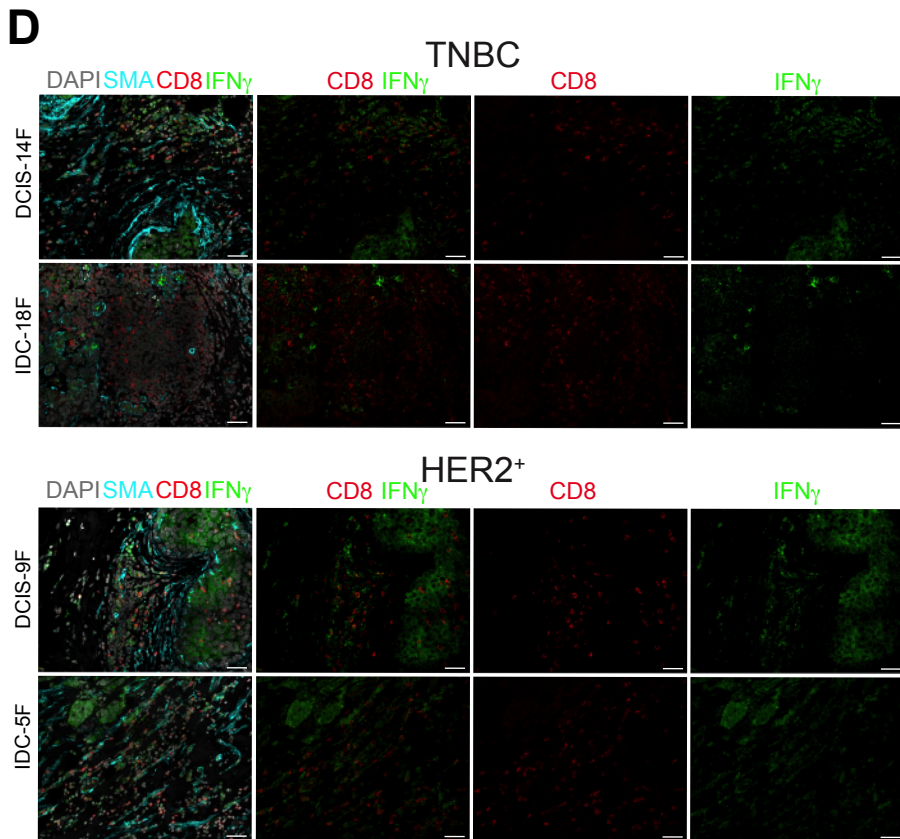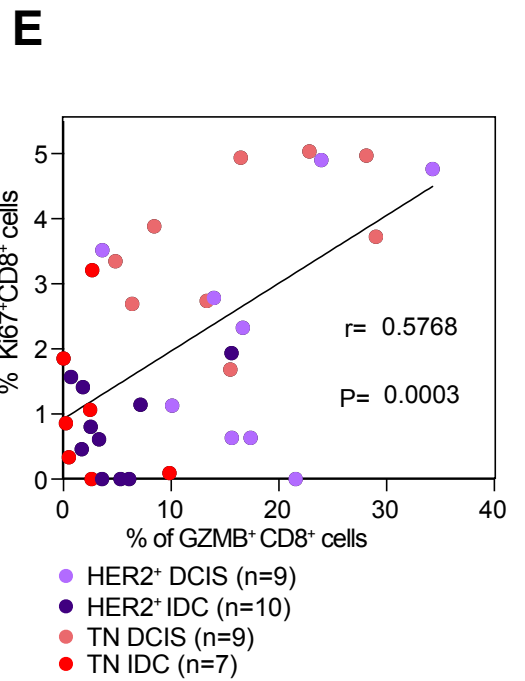

Suppl. Fig. S3

**Supplementary Figure S3.** Activity status of T cells. **A**, MKI67 expression in T cells based on RNA-seq data. Low and high Ki67<sup>low</sup> and Ki67<sup>high</sup> samples were defined by a cut-off of 0.5. **B**, Heatmap depicting the clustering of DCIS samples based on mRNA levels of MKI67, GZMA, and GZMB. **C**, Plot depicting correlation between naïve and cytotoxic T cell gene expression signatures in MKI67<sup>high</sup> (red) and MKI67<sup>low</sup> (blue) T cells. **D**, Immunofluorescence analysis of IFN $\gamma$ <sup>+</sup> CD8<sup>+</sup> T cells in TNBC and HER2<sup>+</sup> breast tumors. Images are a montage of nine fields captured from one area of the tissue. Scale bar 50  $\mu$ m. **E**, Plot depicting correlation between proportion of GZMB<sup>+</sup> and Ki67<sup>+</sup> CD8<sup>+</sup> cells in HER2<sup>+</sup> DCIS and IDC, and TN DCIS and IDC based on immunofluorescence analysis.

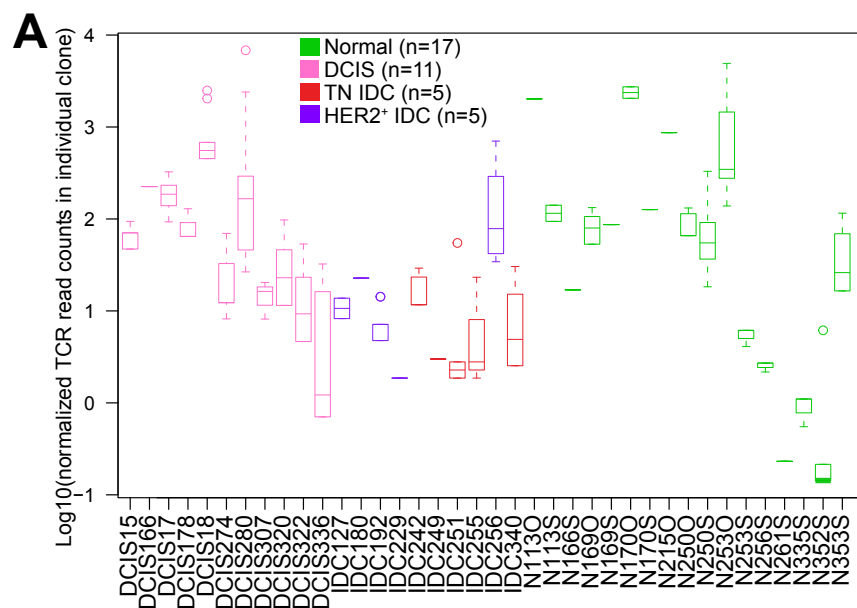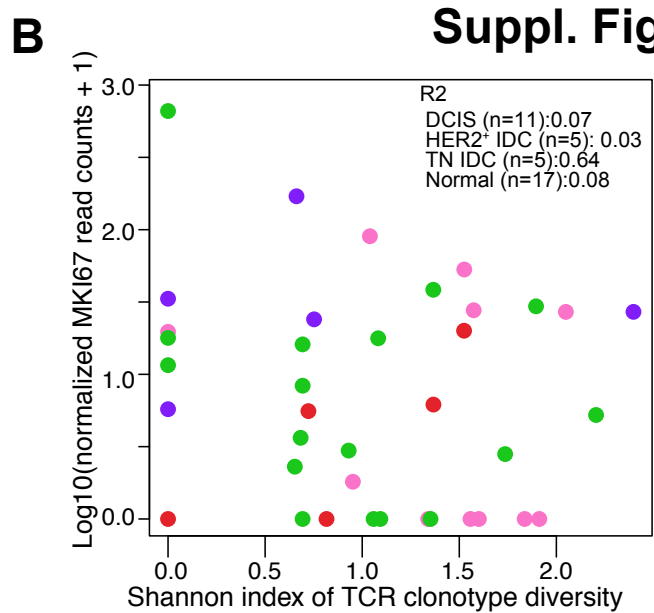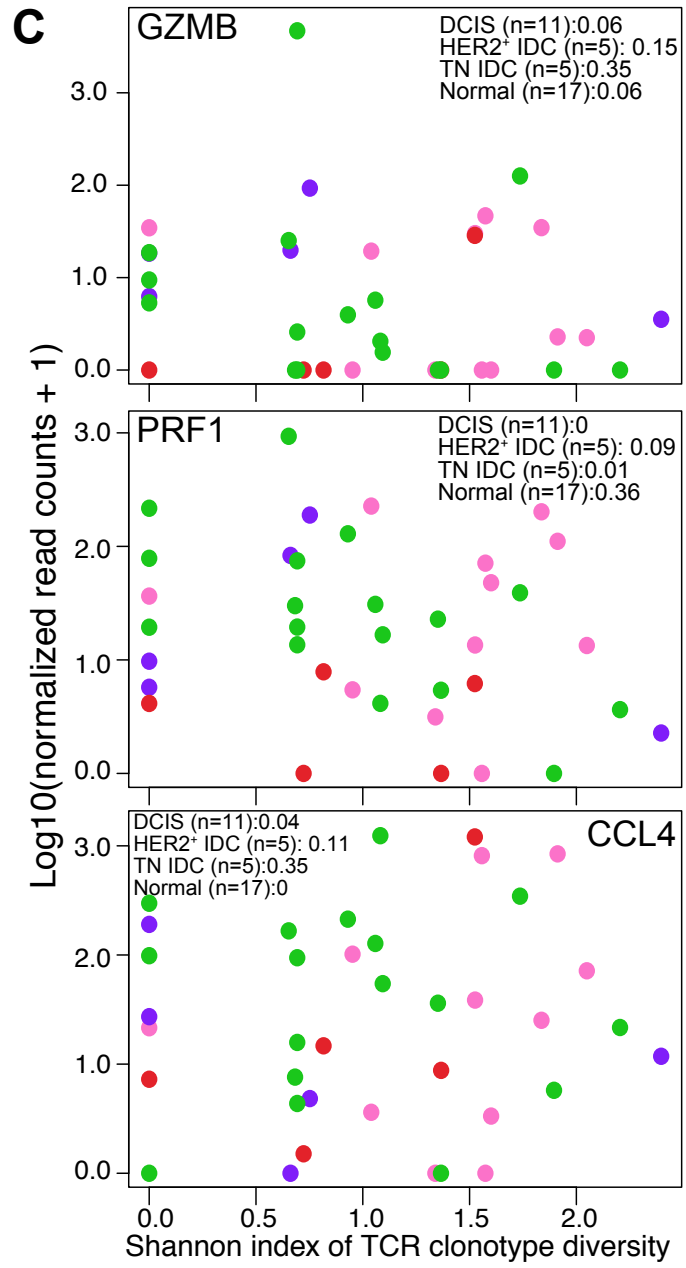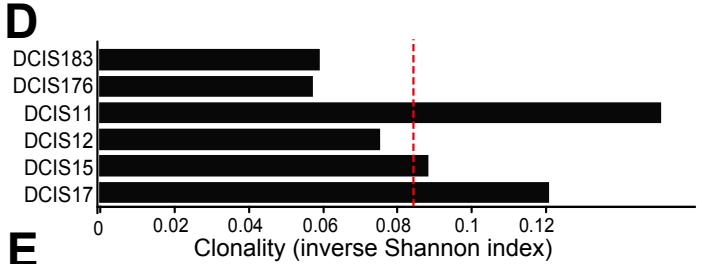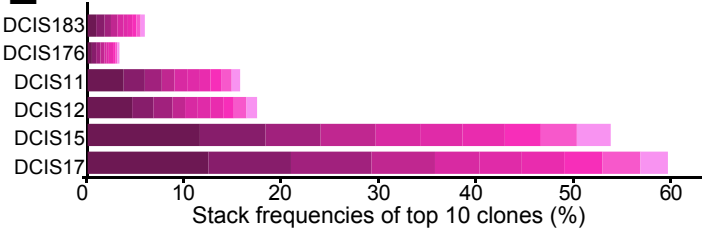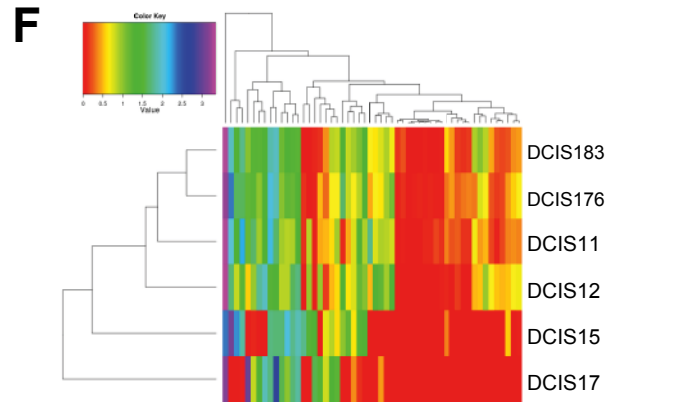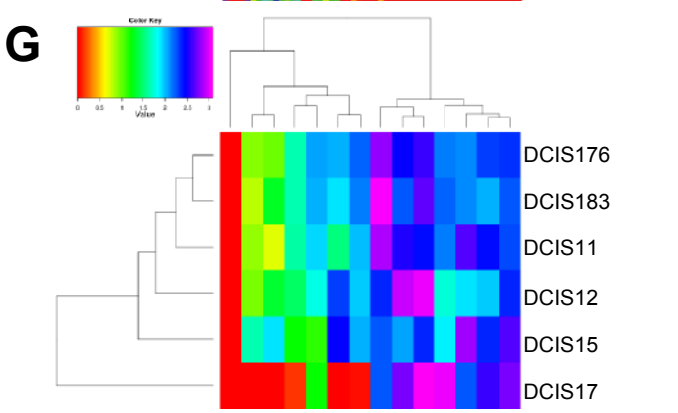

**H**

| AA sequence     | Clone frequency (%) |        |        |        |         |         | Epitope | Epitope sequence | HLA restriction | Epitope ID | Protein |
|-----------------|---------------------|--------|--------|--------|---------|---------|---------|------------------|-----------------|------------|---------|
|                 | DCIS11              | DCIS12 | DCIS15 | DCIS17 | DCIS176 | DCIS183 |         |                  |                 |            |         |
| CASSLGQAYEQYF   | 0.000               | 0.000  | 0.000  | 0.000  | 0.100   | 0.044   | EBV-FL9 | FLRGRAYGL        | HLA-B*08        | 16878      | EBNA-3  |
| CSALIGADPYGYTF  | 0.000               | 0.000  | 0.000  | 2.770  | 0.039   | 0.020   | UK      | UK               | UK              | UK         | UK      |
| CASSYWGLAGDTQYF | 0.000               | 0.000  | 0.000  | 0.112  | 0.002   | 0.001   | UK      | UK               | UK              | UK         | UK      |
| CASSESYGYTF     | 0.042               | 0.000  | 4.454  | 0.000  | 0.040   | 0.000   | UK      | UK               | UK              | UK         | UK      |

**Supplementary Figure S4.** TCR clonality in breast tissues. **A**, TCR clonotypes in each sample. **B**, Correlation plot between MKI67 expression (y-axis) and Shannon index of TCR clonotype diversity. R2 values and number of samples in each group are indicated. **C**, Correlation plot between the expression of the indicated T cell activation markers (y-axis) and Shannon index of TCR clonotype diversity. R2 values and number of samples in each group are indicated. **D**, Measurement of T cell clonality (inverse of normalized Shannon index) in each DCIS sample. Clonality varies from 0-1 with 0 being a flat distribution and 1 being an entirely oligoclonal sample. Red dash line represents median of clonality. **E**, The frequencies of the top 10 clones in each sample. **F-G**, Heatmap of normalized frequencies of TCRv (**F**) and j (**G**) genes in each sample. **H**, Four common TCR clones in the top 100 clones in each sample based on amino acid sequences. Numbers are percentage of total reads. Clone frequency in each DCIS, predicted epitope, epitope sequence, HLA restriction, epitope ID, and protein are indicated. UK – unknown. Shading intensity correlates with relative frequency of the clone.



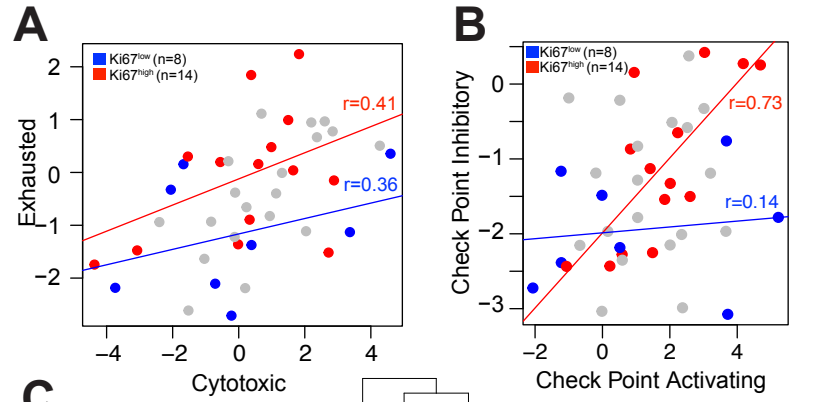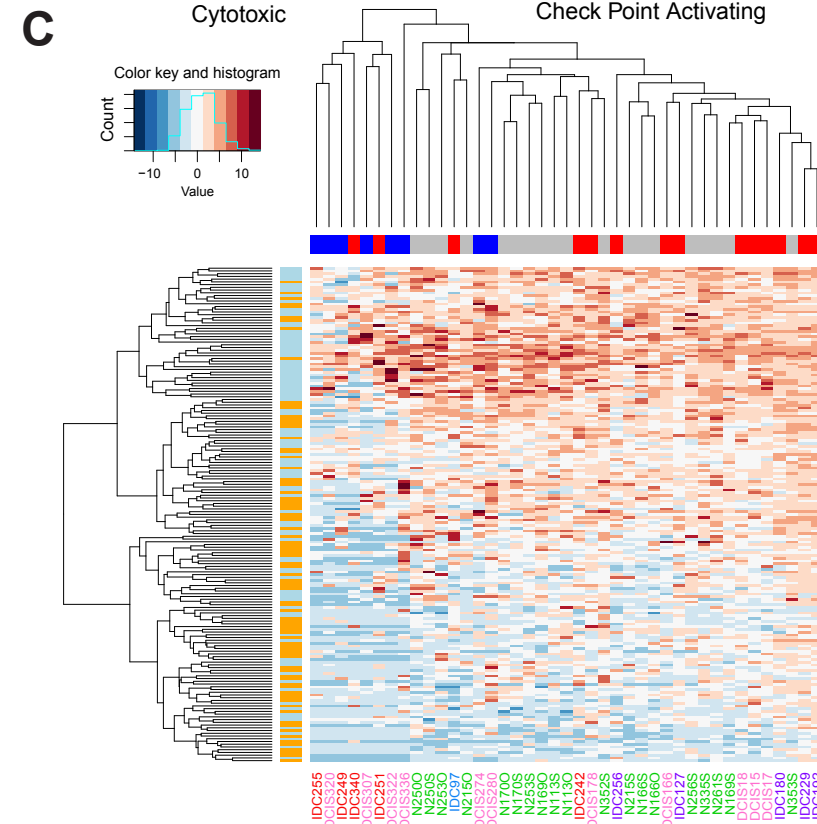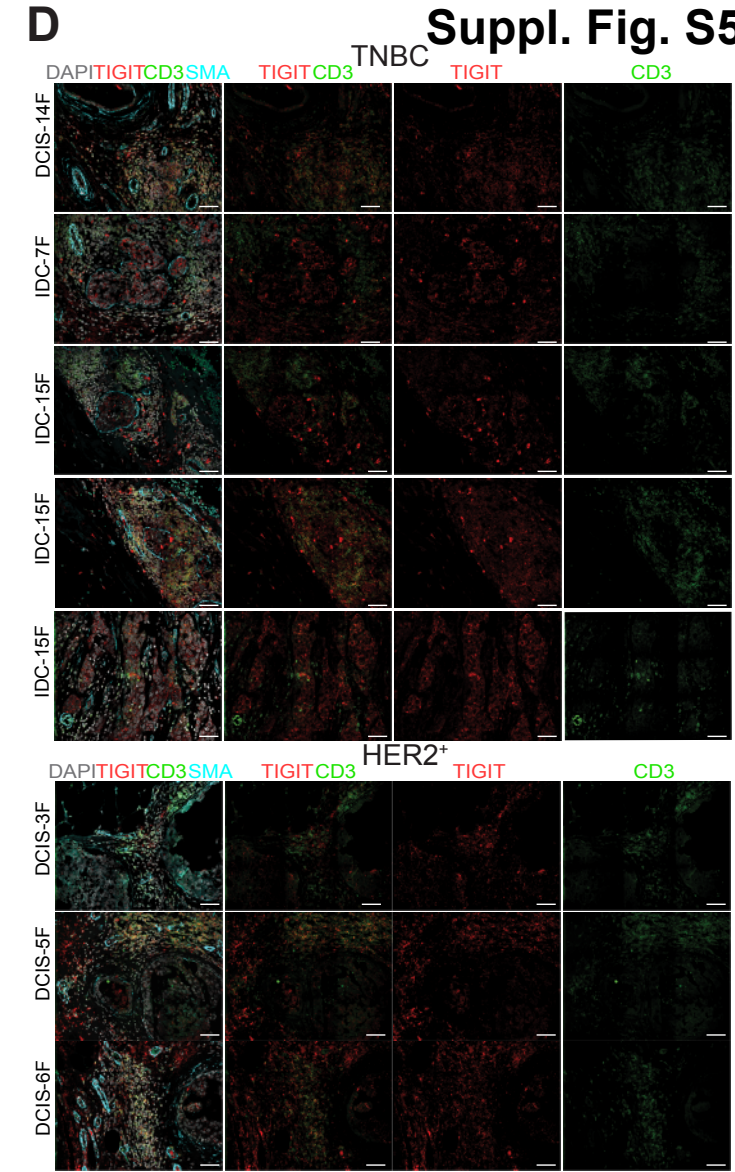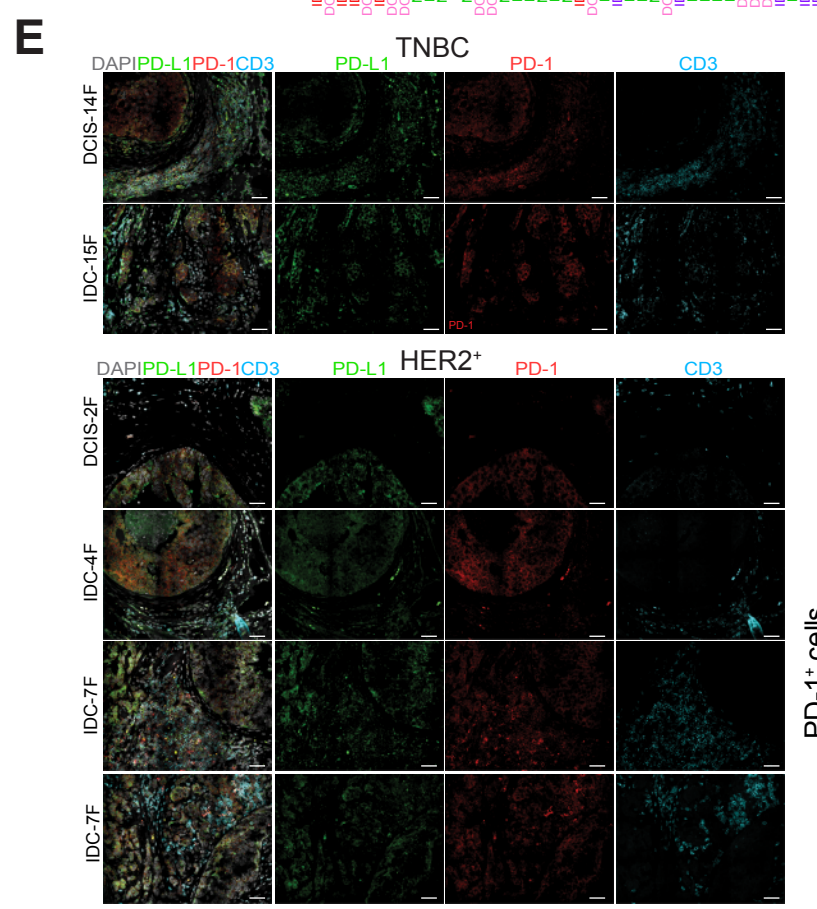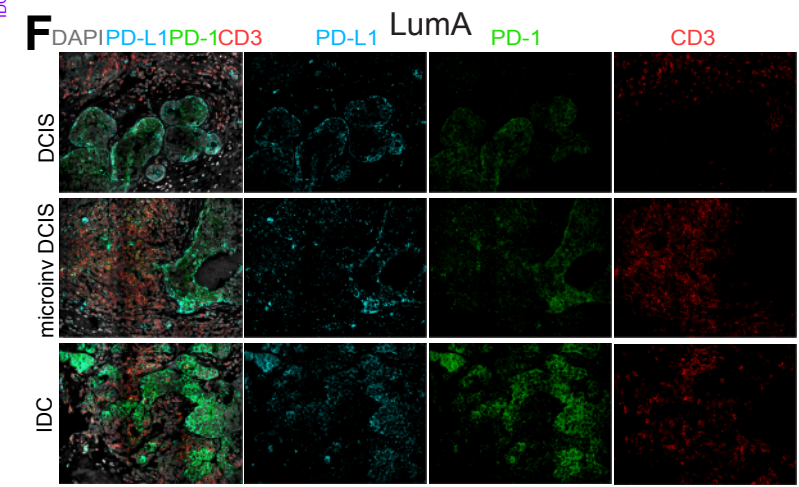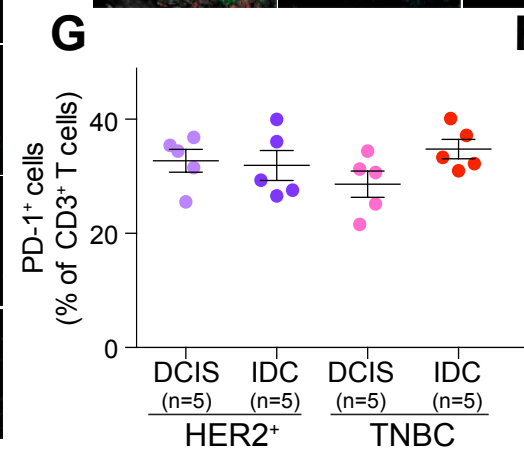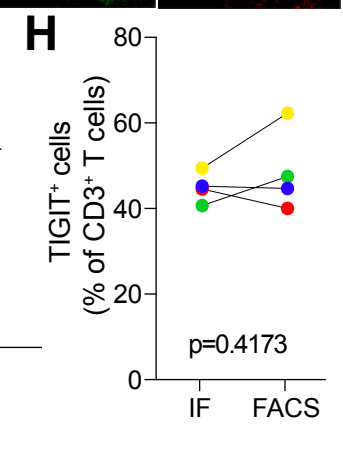

**Supplementary Figure S5.** Activity status of T cells. **A-B** Plot depicting correlation between exhausted and cytotoxic T cell signatures (**A**) and between the expression of inhibitory and activating immune checkpoint proteins (**B**) in MKI67<sup>+</sup> (red) and MKI67<sup>-</sup> (blue) cells. **C**, Heatmap depicting clustering of T cells based on expression of activation-dysfunction-related genes (**Supplementary Table S5**). Red and blue marks MKI67<sup>high</sup> and MKI67<sup>low</sup> T cells in tumors, respectively, whereas gray corresponds to normal samples. Orange are activation related genes and pale blue are dysfunction related. **D**, Immunofluorescence analysis of TIGIT, CD3, and SMA in triple negative (TNBC) and HER2<sup>+</sup> DCIS and IDC. **E**, Immunofluorescence analysis of PD1, PDL1, CD3, and SMA in triple negative (TNBC) and HER2<sup>+</sup> DCIS and IDC. **F**, Immunofluorescence analysis of PD1, PDL1, and CD3 in a luminal A, IDC with adjacent DCIS. Throughout, images are a montage of nine fields captured from one area of the tissue. Scale bar 50  $\mu$ m. **G**, Graphs depicting the frequencies of PD1<sup>+</sup>CD3<sup>+</sup> T cells in multiple regions of five samples per group. Error bars, S.E.M. **H**, Frequency of TIGIT<sup>+</sup> T cells determined by FACS or immunofluorescence (IF) in the same cases. Frequencies are not significantly different between the two methods.

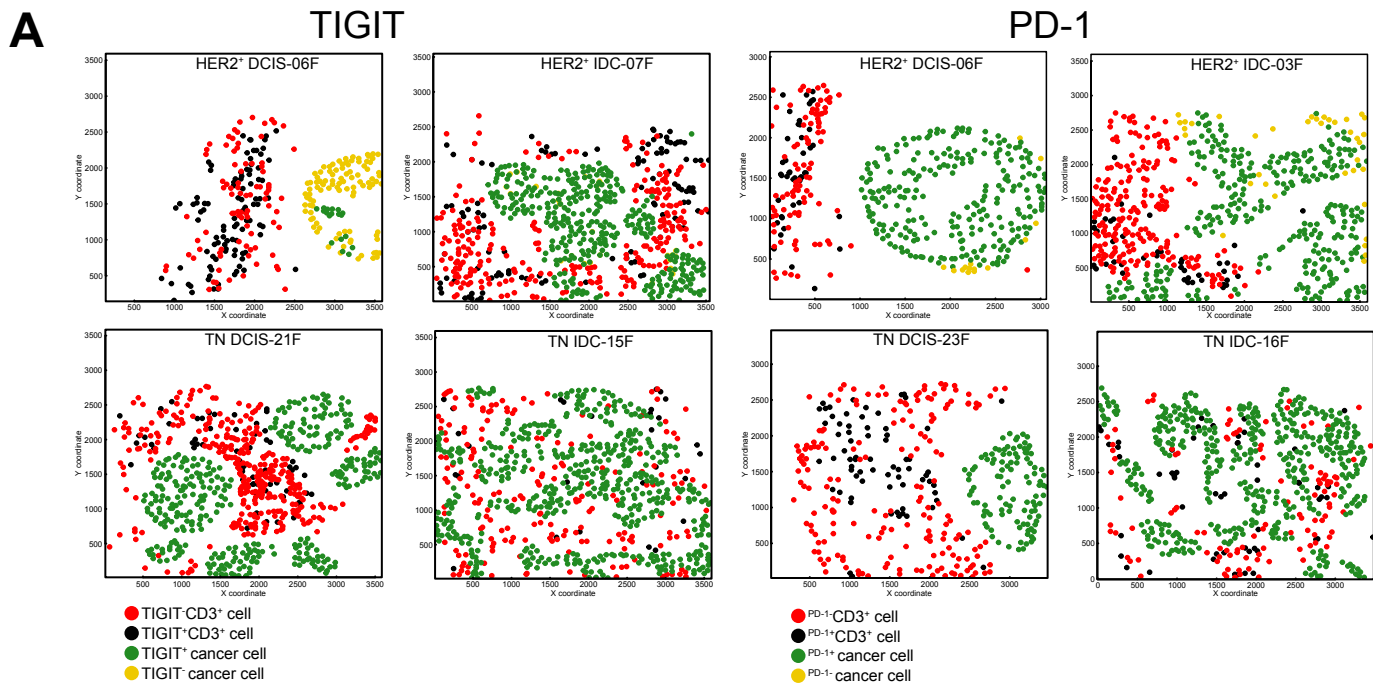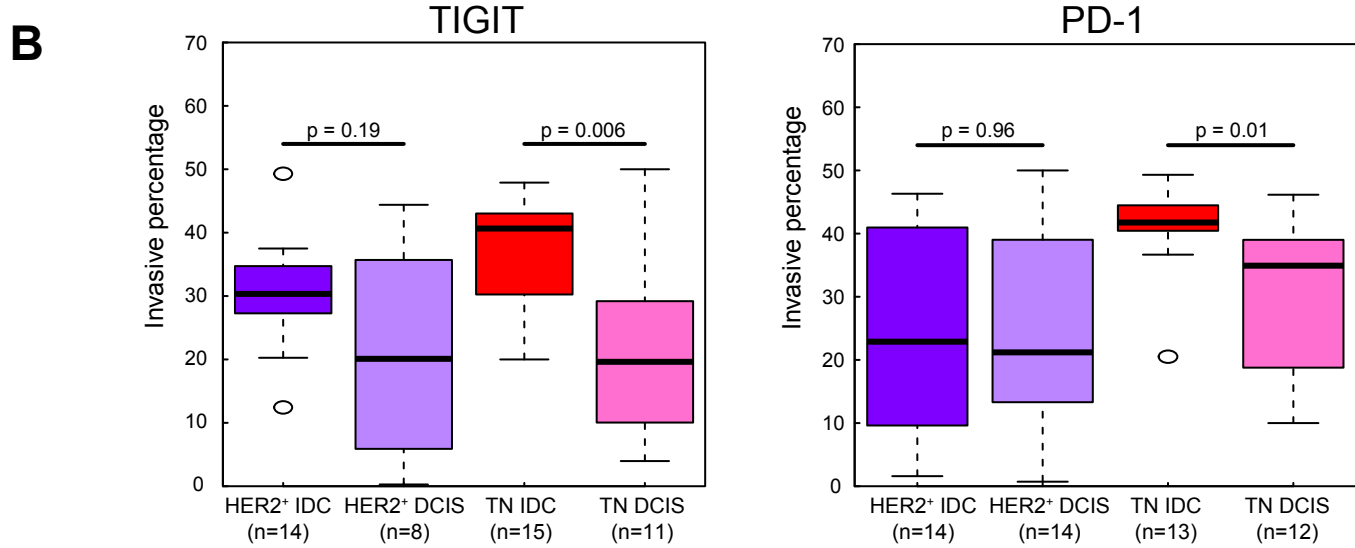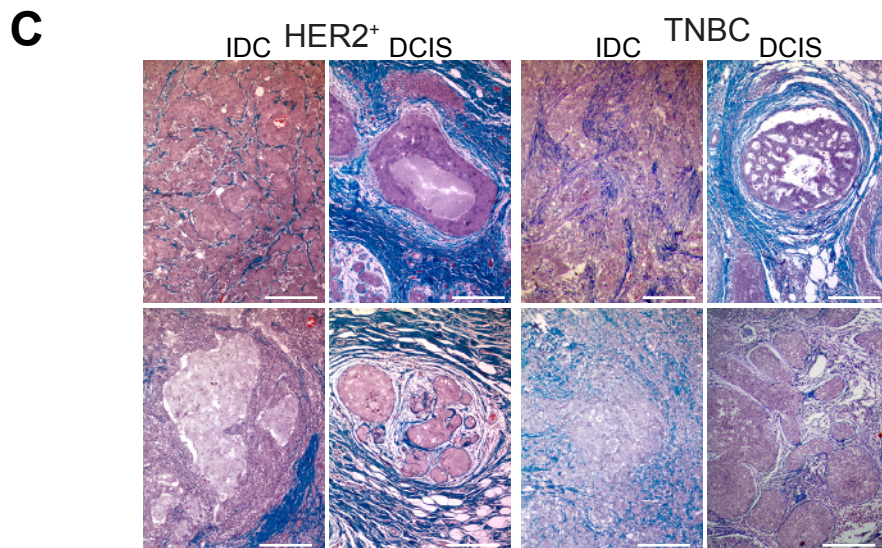

**Supplementary Figure S6.** Tumor topology. **A**, Two-dimensional coordinate spatial distribution of T cell populations and tumor cell populations. **B**, Boxplot depicting invasive percentage scores between tumor cells and T cells (defined in **Methods** section) stratified by tissue types (HER2<sup>+</sup> IDC; HER2<sup>+</sup> DCIS; TN IDC; TN DCIS): left panel: samples with TIGIT expression being measured; right panel PD1 expression level being measured. P-values are calculated using two-sided T test. **C**, Trichrome-stained images of DCIS and IDC. Scale bar 100  $\mu$ m.

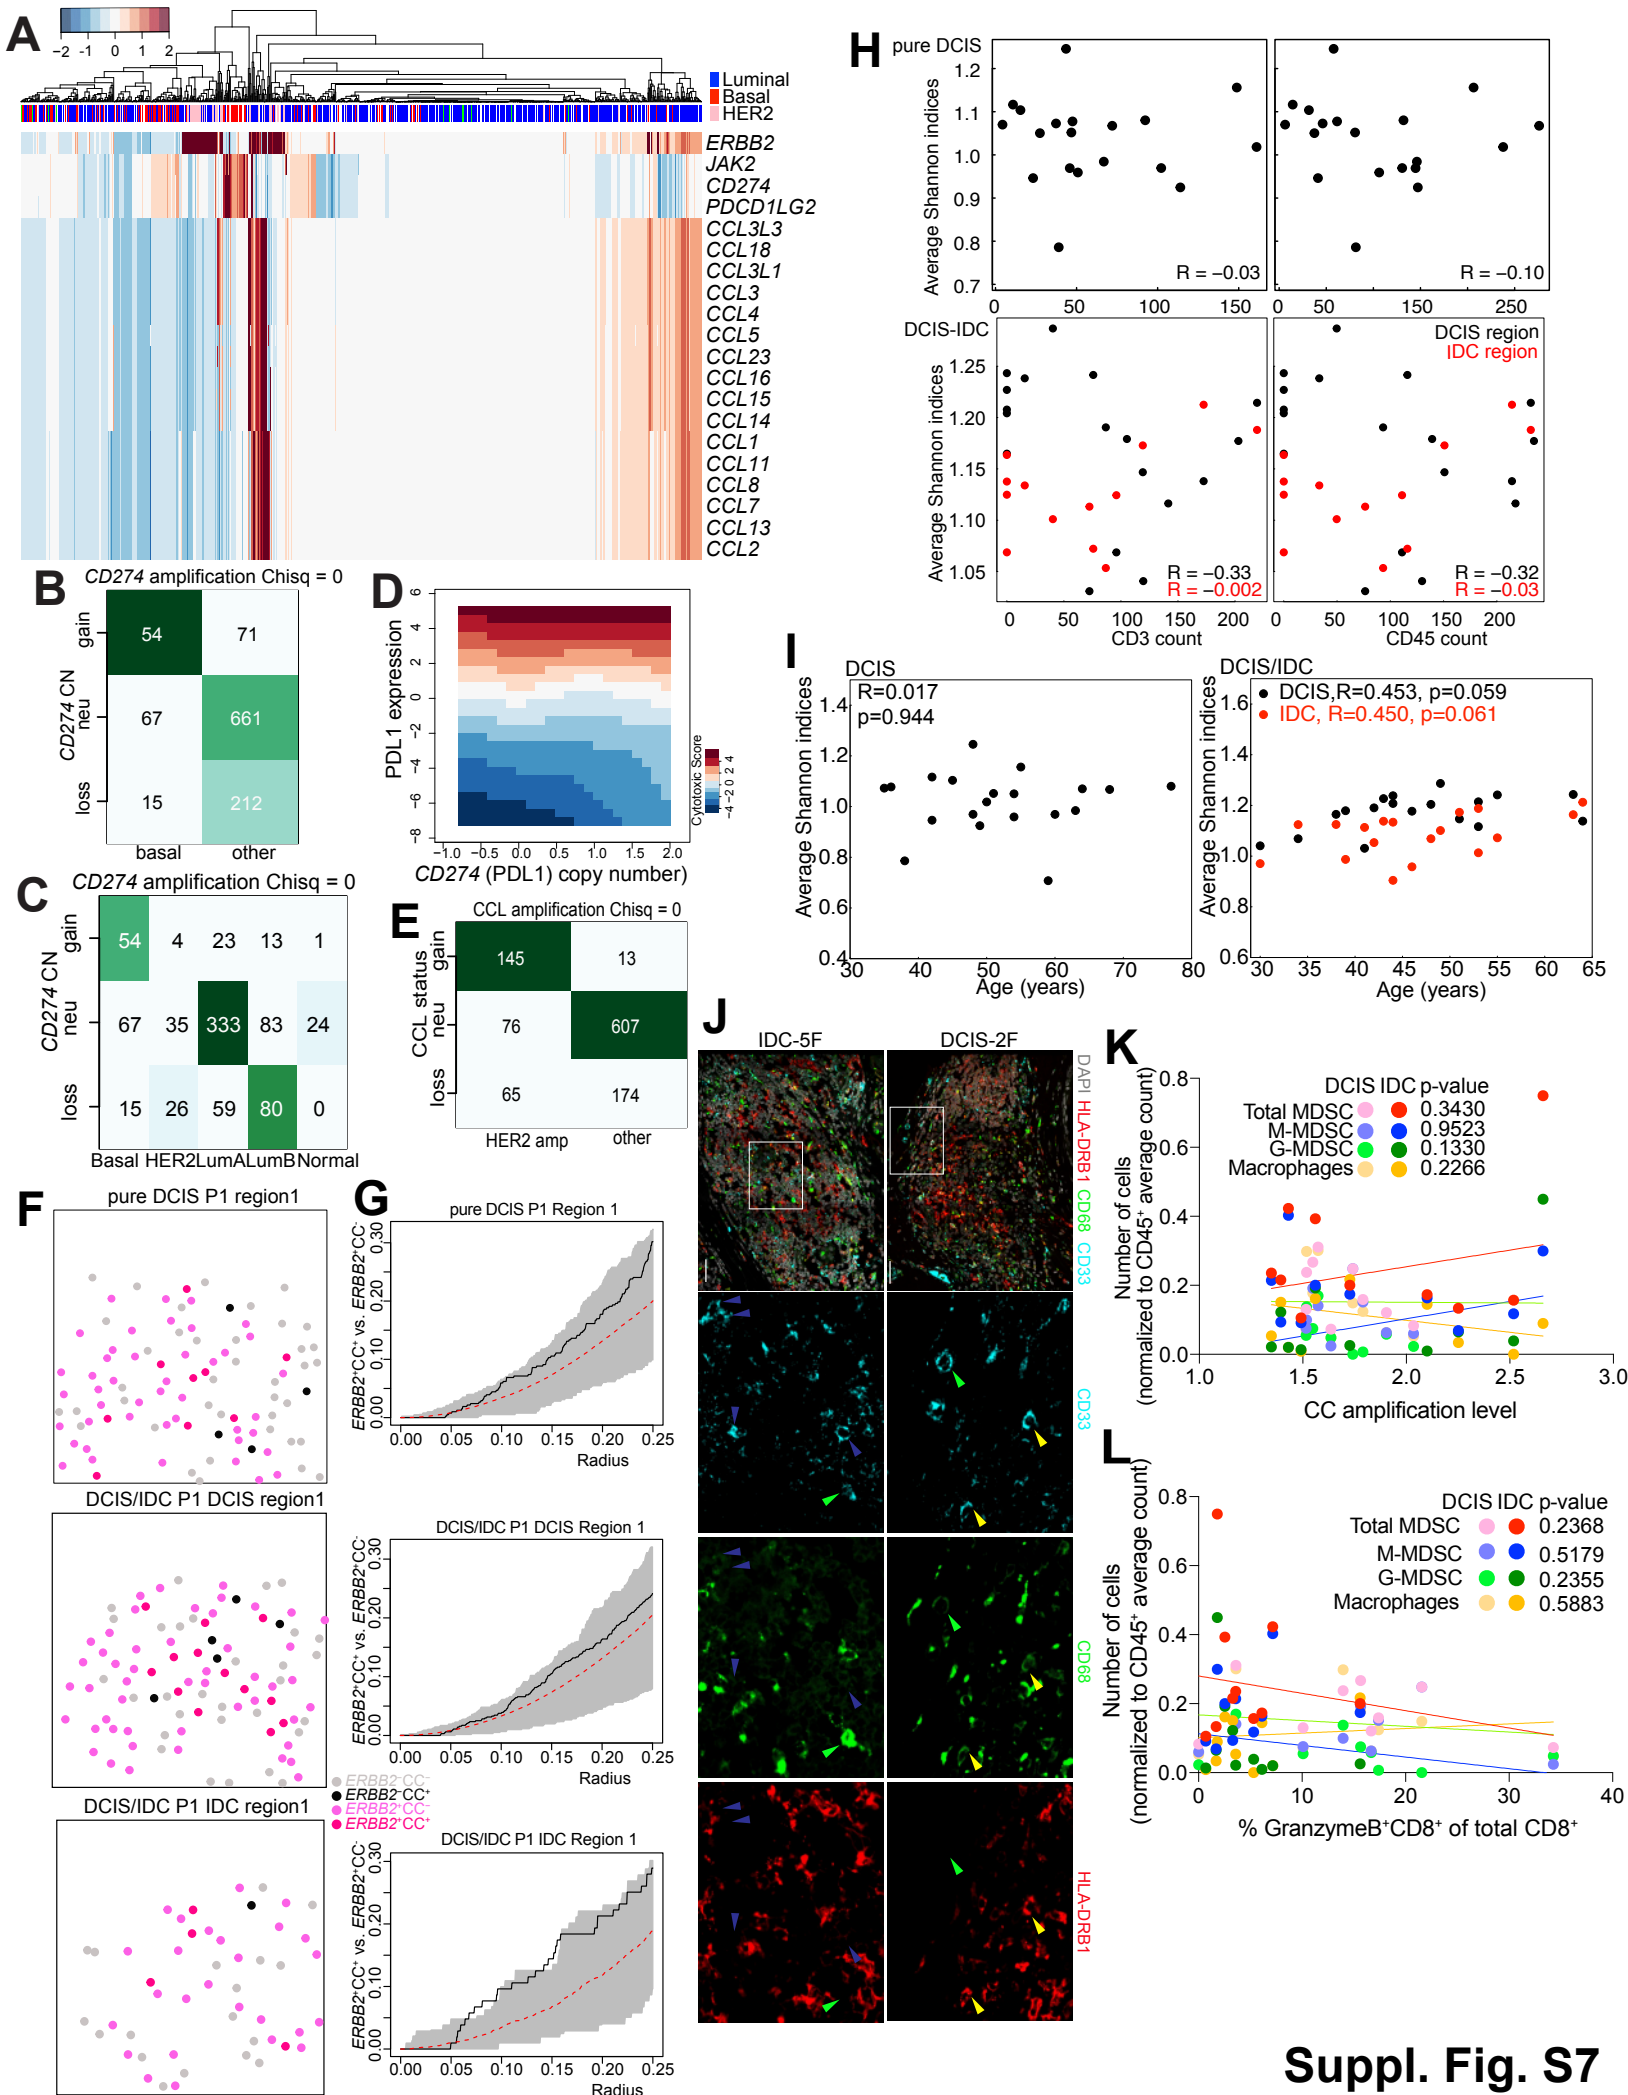

**Supplementary Figure S7.** Immune-related amplicons in breast cancer. **A**, Copy number (log<sub>2</sub> ratio) for *ERBB2*, and 17q12 and 9p24 amplicon genes in the TCGA cohort. **B-C**, Contingency table of the frequency of gain of the CD274 (PDL1) locus in basal-like patients compared to all other patients in the TCGA cohort. **D**, Level plot illustrating the contribution of PDL1 gene expression and CD274 copy number to cytotoxic CD8<sup>+</sup> T cell gene expression score. **E**, Contingency table of amplification of 17q12 (CC) locus in HER2<sup>+</sup> patients compared to all other patients. **F**, Two-dimensional coordinate spatial distribution of the indicated four cell types in pure DCIS, and in DCIS and IDC regions of DCIS/IDC. **G**, Graphs depicting that the topologic distribution of most of the real samples do not deviate from the complete spatial randomness significantly, manifested by the Ripley's K function of the data (black curve) lying within the 95% confidence band of the K function of the simulated datasets (grey area). **H**, Average Shannon index for 17q12 amplicon over all the samples of each patient vs. CD3<sup>+</sup> and CD45<sup>+</sup> cell counts in pure DCIS and in DCIS/IDC (red dots: DCIS, black dots: IDC). No significant association between CD3 or CD45 cell counts and average Shannon index is detected. **I**, Average Shannon index based on *ERBB2* and CC amplification for all the cells in each region across sampled regions in each patient vs. patient's age. **J**, Immunofluorescence analysis of myeloid-derived suppressor cells (MDSCs) and macrophages. Arrows indicate cell types as follows: macrophage – yellow, monocytic MDSC – blue, granulocytic MDSC – green. Scale bar 50 μm. **K-L**, Plot depicting correlation between number of MDSCs in DCIS and IDC and CC copy number (**K**) and frequencies of GZMB<sup>+</sup>CD8<sup>+</sup> T cells (**L**). M-MDSC: monocytic MDSCs and G-MDSC: granulocytic MDSC.

## Supplementary Methods

### Attempt at addressing the sampling error problem when estimating cell frequencies based of staining of tissue sections vs. whole tumor analysis (e.g., FACS):

We design the following spatial-based simulations to demonstrate the difficulty level of sampling a region from a  $1\text{cm} \times 1\text{cm} \times 1\text{cm}$  squared cube that is representative of the spatial distribution of different cell types. For simplicity, we assume there are only two types of cells (Type 0 and Type 1), e.g. Tregs and all other Tcells. We further assume that there exist  $n = 10,000$  cells in total in each squared cube. To mimic the real-life experiments, we then investigate the normalized squared distance between the population proportion of Type 1 cells and the sampled proportions of Type 1 cells by taking five different  $4\mu \times 1\text{cm} \times 1\text{cm}$  slides. The positions of the five sampled slides are chosen randomly along one of the three dimensions. We consider a range of parameters by (1) changing the population proportion of Type 1 cells and (2) changing the spatial distribution of Type 1 cells from uniformly distributed to clustered in a focal region. The simulations are generated as follows:

1. The positions of the cells not marked with type yet are distributed as a three-dimensional uniform distribution  $\text{Uniform}([0,1] \times [0,1] \times [0,1])$ .
2. We first look at how the magnitude of the proportion of Type 1 cells influences the sampling error. Conditioning on each position, we assume that this proportion is always  $p$ , regardless of the position of the cell. The figure below shows that as the proportion increases the error becomes smaller. The grey lines are the squared distance for each 500 iterations of the simulation and the blue line is the average across 500 iterations. The squared distance is normalized by the true population proportion.

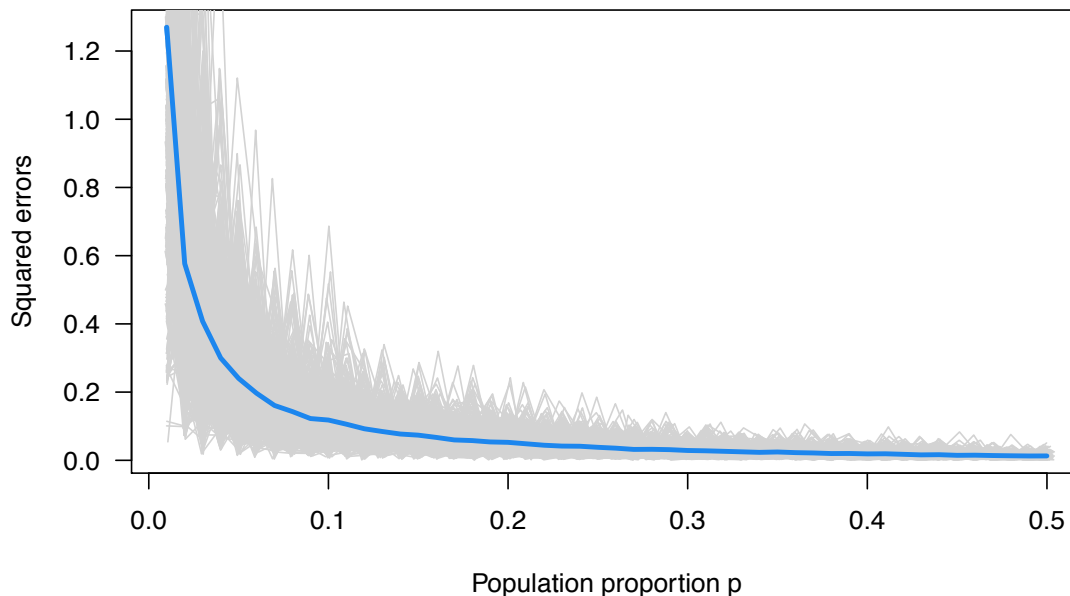

3. Then we fix the proportion of Type 1 cells to be 0.05, and change the “evenness” of the cell type distribution within the cube. We define the “evenness” as how tight the Type 1 cells are distributed around the center of the cube for simplicity. For instance, when the “evenness = 0.2”, this means that all Type 1 cells are located within  $0.2\text{cm} \times 0.2\text{cm} \times 0.2\text{cm}$  cubic neighborhood around the center  $(0.5, 0.5, 0.5)$  of the cube. The larger this value is, the more “even” the Type 1 cells are distributed in the original cube. Figure 2 below shows that the estimation error decreases as the evenness increases, as we expected. The grey lines are the squared distance for each 500 iterations of the simulation and the blue line is the average across 500 iterations.

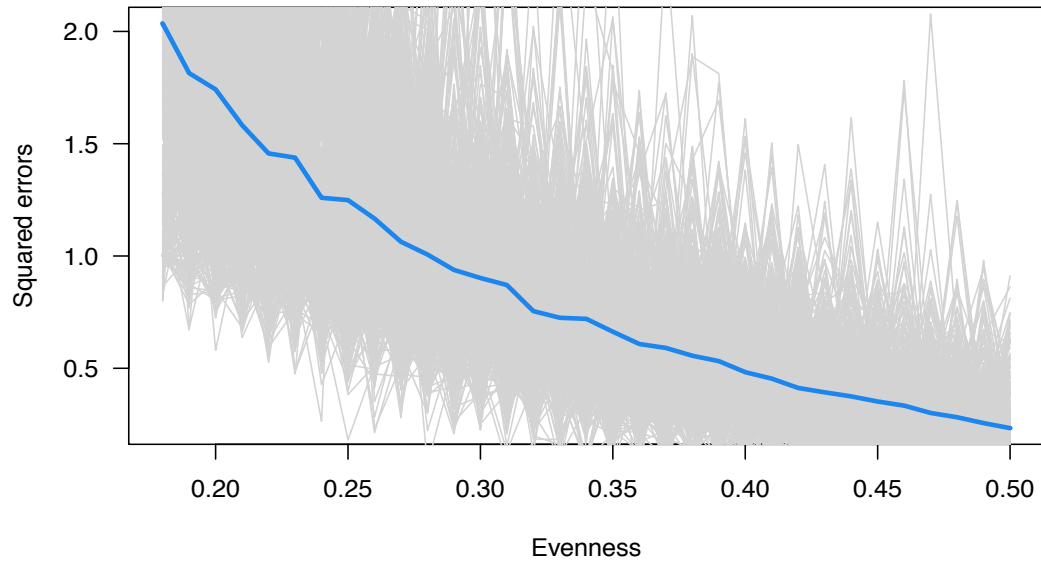

The predictions of this model perfectly fit with our data where we saw poor correlation for Tregs that are <10% frequency and good correlation for CD4<sup>+</sup> and CD8<sup>+</sup> cells that are more common (~40-50% of all T cells). This simulation also highlights that all studies that quantify rare cell types based on immunostaining of slides have a high error rate and should be taken with caution.
